# Supplementary material for: Understanding the Role of Persistent Organic Pollutants and Stress in the Association between Proximity to the World Trade Center Disaster and Birth Outcomes
Source: MDPI journal article supplement (doi:10.3390/ijerph19042008), 2022-02-11
Supplement: s1 [file s1]

**Title:** Understanding the Role of Persistent Organic Pollutants and Stress in the Association between Proximity to the World Trade Center Disaster and Birth Outcomes

**Authors:** Miranda J Spratlen\*<sup>a</sup>, Frederica P Perera<sup>a</sup>, Andreas Sjodin<sup>b</sup>, Yuyan Wang<sup>c</sup>, Julie Herbstman<sup>a§</sup>, Leonardo Trasande<sup>c,d,e §</sup>

**Author Affiliations:** <sup>a</sup>Columbia Center for Children’s Environmental Health, Department of Environmental Health Sciences, Columbia University Mailman School of Public Health, New York, New York; <sup>b</sup>Centers for Disease Control and Prevention; National Center for Environmental Health; Division of Laboratory Sciences, Atlanta, GA; <sup>c</sup>Department of Population Health, New York University Langone Health, New York, NY; <sup>d</sup>Department of Pediatrics, New York University School of Medicine, New York, NY; <sup>e</sup>Department of Environmental Medicine, New York University School of Medicine, New York, NY

<sup>§</sup>**Co-last authors**

**Pages:** 10

**Figures:** 3

**Tables:** 10

## Supporting Information

a. Previously Observed Associations in this Cohort<sup>1</sup>

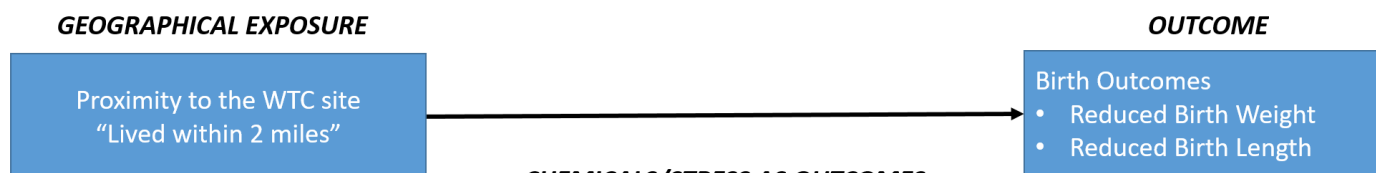

b. Associations Evaluated in this Study

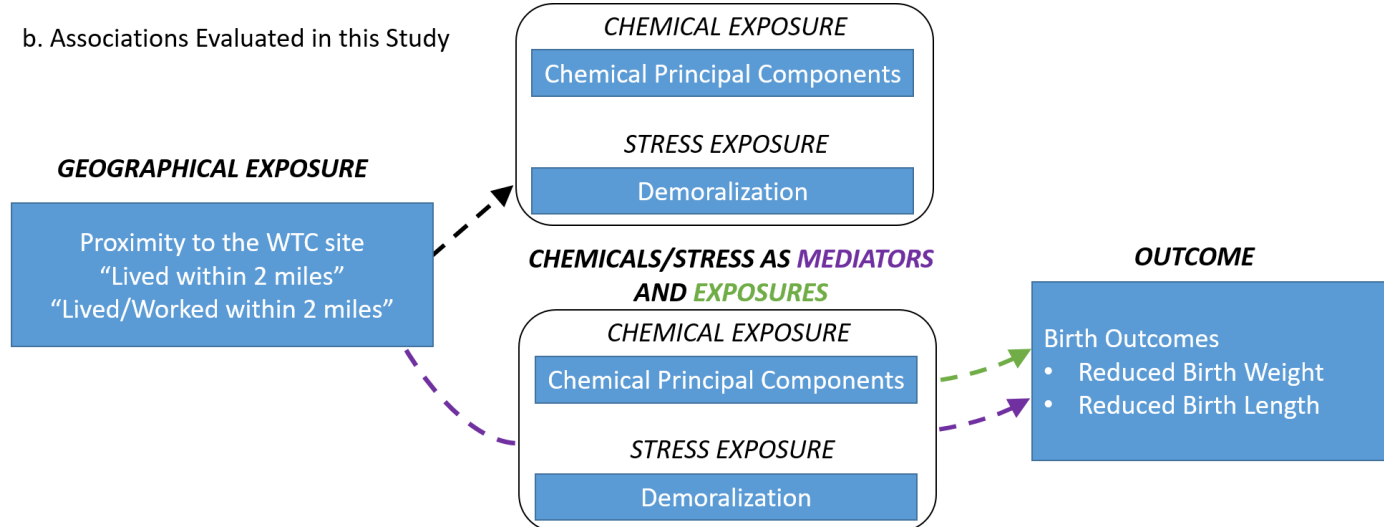

Figure S1. Schematic of Study Associations Evaluated.

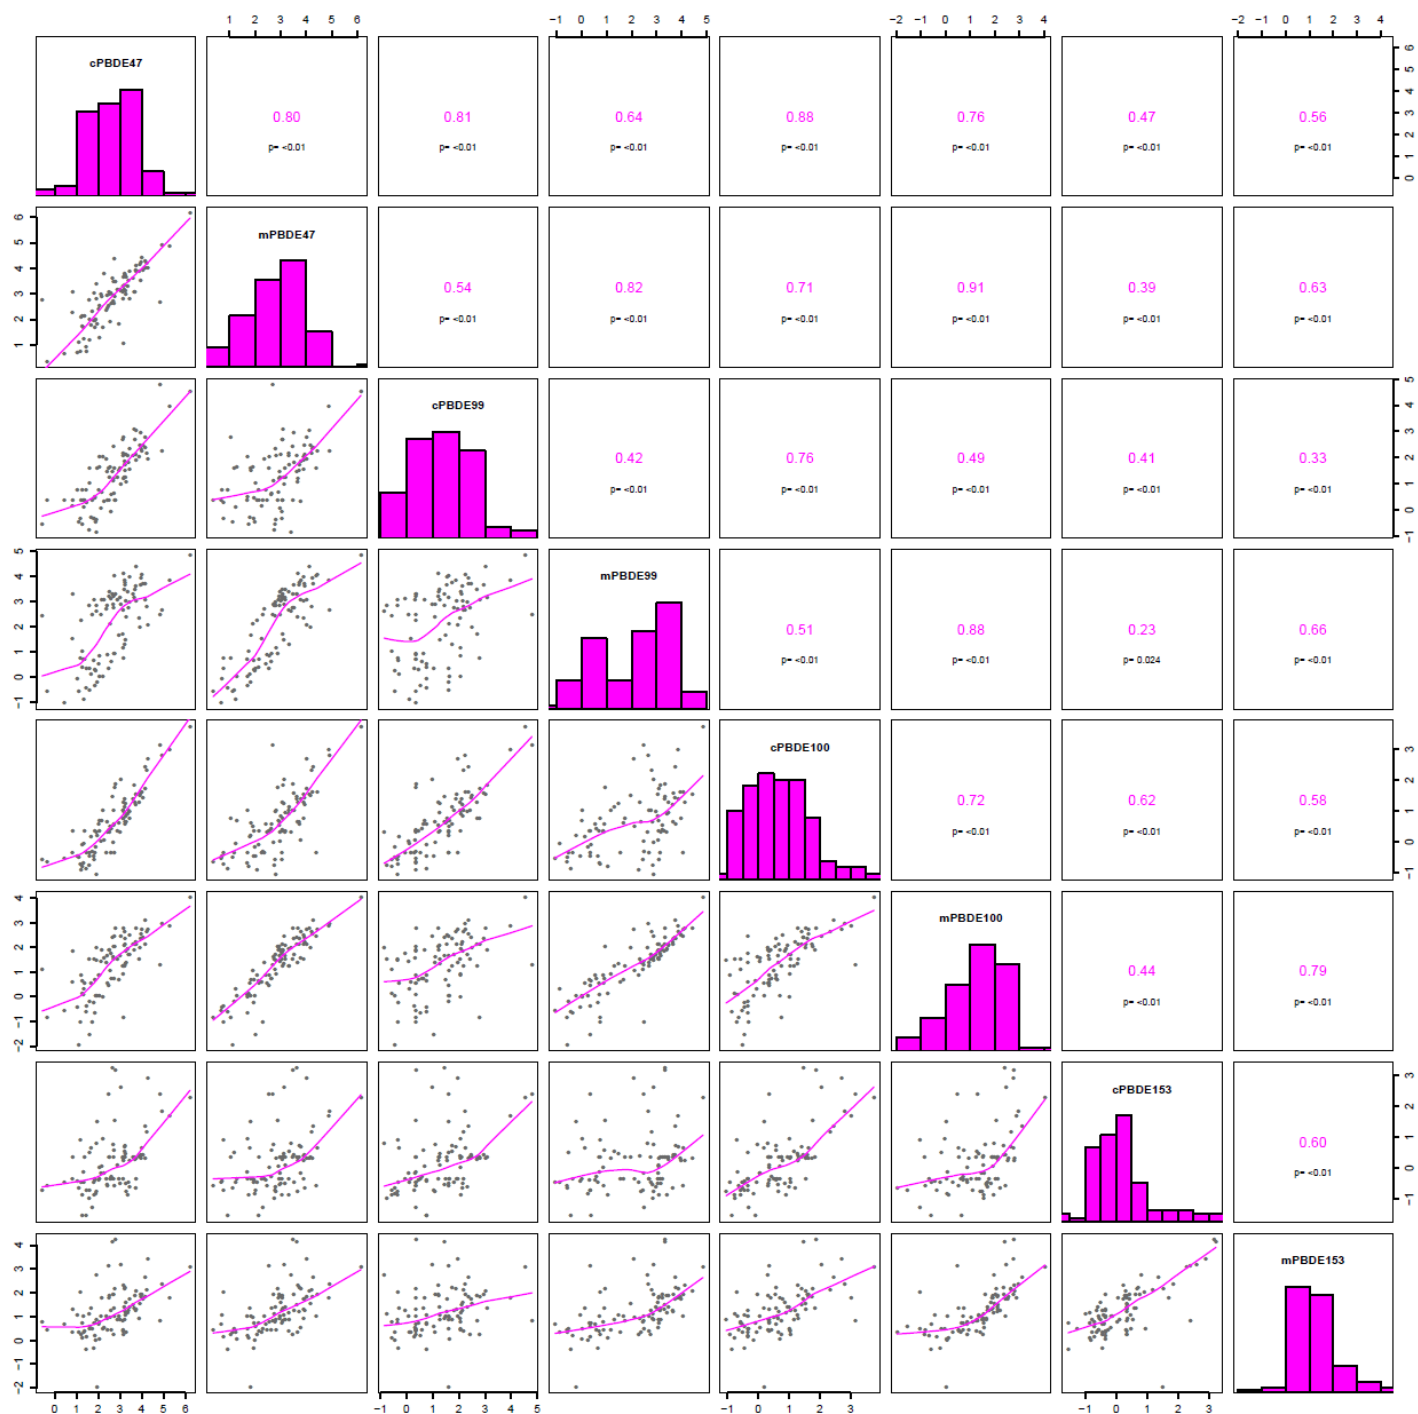

Figure S2a. Maternal – cord correlations for PBDEs (N=94).

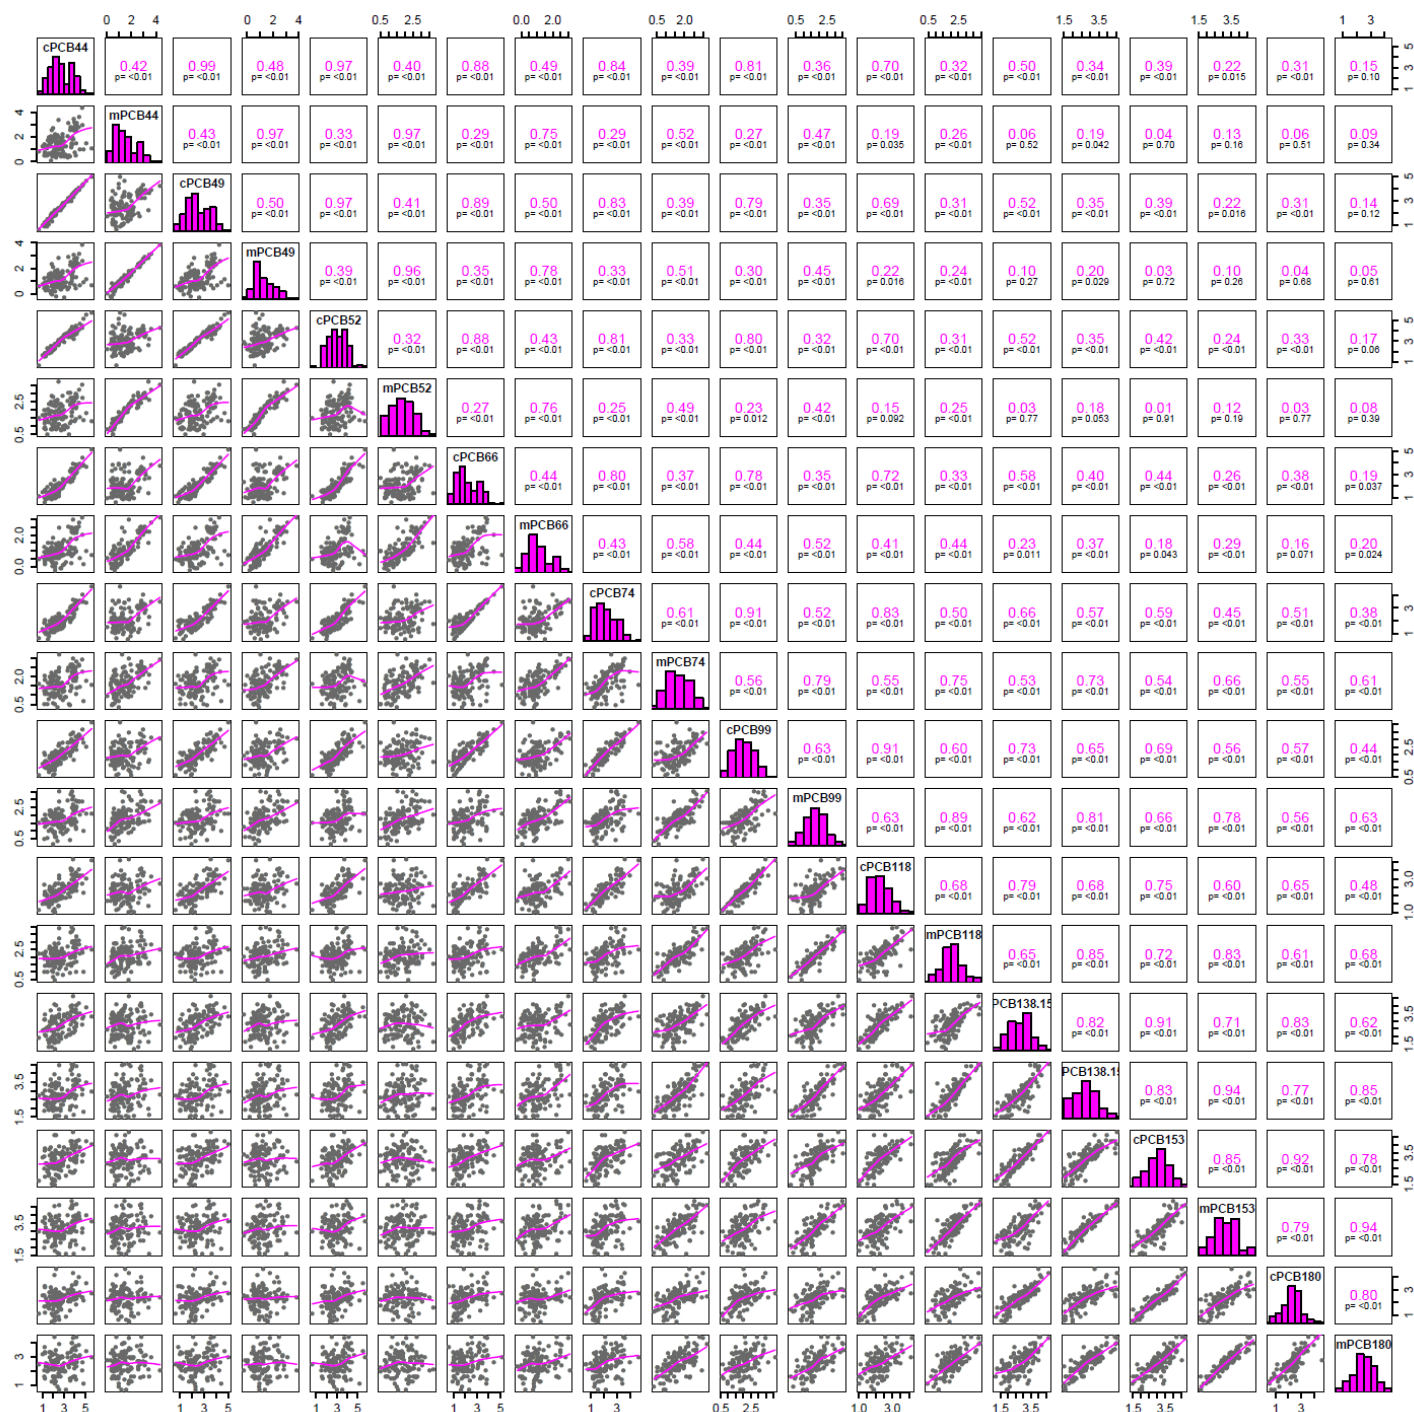

Figure S2b. Maternal – Cord Correlations for PCBs (n=121).

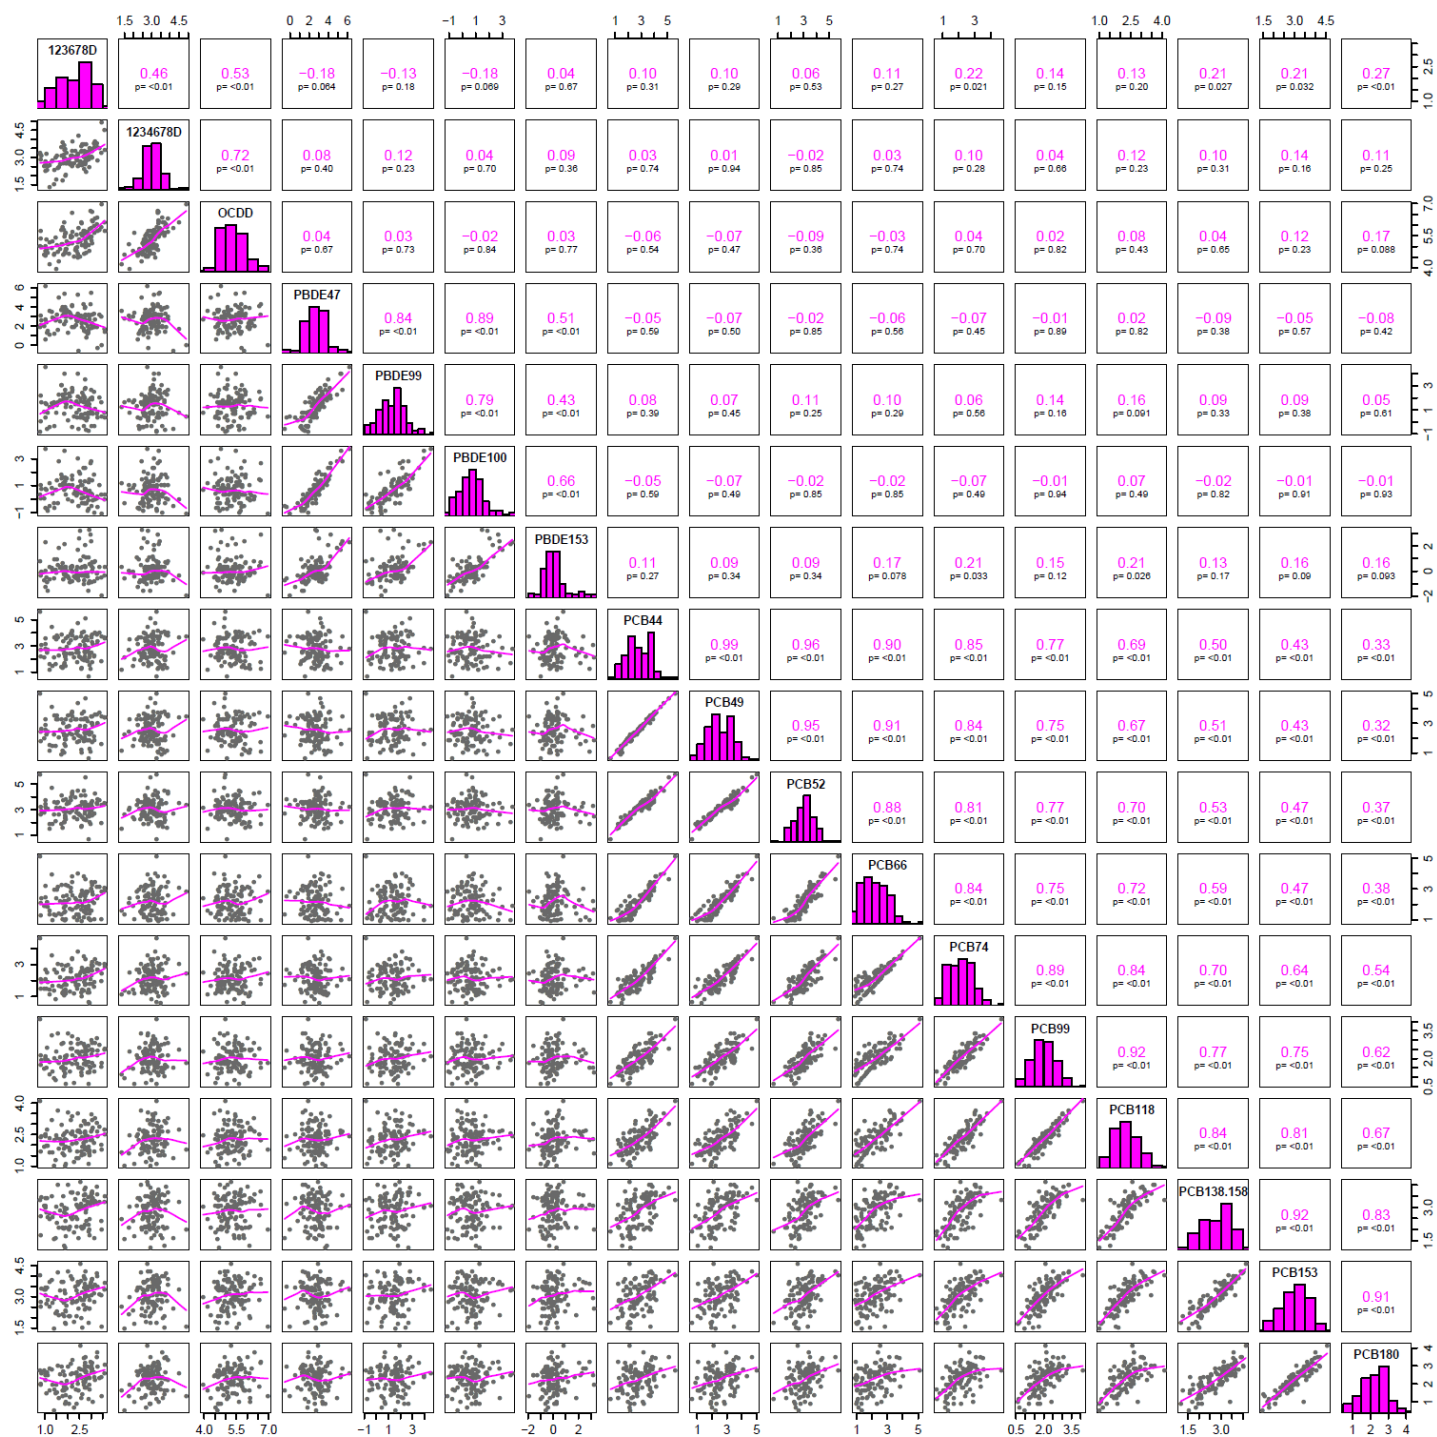

Figure S3. Correlation Matrix of PCDDs, PBDEs and PCBs.

Table S1. Maternal-to-Cord Transformations of PCBs and PBDEs.

| Congener   | Transformation Formula                                      |
|------------|-------------------------------------------------------------|
| PCB44      | $1.8451133 + (0.6356086 \times \text{Maternal PCB44})$      |
| PCB49      | $1.6661639 + (0.6929260 \times \text{Maternal PCB49})$      |
| PCB52      | $2.2510225 + (0.4548271 \times \text{Maternal PCB52})$      |
| PCB66      | $1.4068923 + (0.7419520 \times \text{Maternal PCB66})$      |
| PCB74      | $0.8618835 + (0.8145036 \times \text{Maternal PCB74})$      |
| PCB99      | $0.9187943 + (0.6616968 \times \text{Maternal PCB99})$      |
| PCB118     | $1.0102781 + (0.6319484 \times \text{Maternal PCB118})$     |
| PCB138.158 | $0.5663911 + (0.8132915 \times \text{Maternal PCB138.158})$ |
| PCB153     | $0.5848827 + (0.7930534 \times \text{Maternal PCB153})$     |
| PCB180     | $0.3893654 + (0.7647683 \times \text{Maternal PCB180})$     |
| PBDE47     | $0.2534549 + (0.8425674 \times \text{Maternal PBDE47})$     |
| PBDE99     | $0.5440749 + (0.3799641 \times \text{Maternal PBDE99})$     |
| PBDE100    | $-0.1280924 + (0.6274888 \times \text{Maternal PBDE100})$   |
| PBDE153    | $-0.6228235 + (0.6580994 \times \text{Maternal PBDE153})$   |

Table S2. Geometric Means and Limits of Detection for Chemicals in Maternal Plasma and Cord Blood.

| <i>Cord Blood PCBs (N=210)</i>  |                     |                |               | <i>Maternal Plasma PCBs (N=173)</i>  |                |               | <i>Cord and Maternal-to-Cord Transformed (N=251)</i> |               |
|---------------------------------|---------------------|----------------|---------------|--------------------------------------|----------------|---------------|------------------------------------------------------|---------------|
|                                 | Number Detected (%) | Geometric Mean | Range         | Number Detected (%)                  | Geometric Mean | Range         | Geometric Mean                                       | Range         |
| PCB44                           | 191 (91.8%)         | 27.12          | (1.91, 272)   | 156 (91.8%)                          | 6.49           | (1.06, 75.9)  | 28.21                                                | (1.91, 272)   |
| PCB49                           | 186 (89.4%)         | 20.12          | (1.91, 156)   | 152 (89.4%)                          | 4.94           | (0.78, 46.7)  | 21.09                                                | (1.91, 156)   |
| PCB52                           | 200 (96.2%)         | 29.24          | (1.91, 303)   | 168 (98.8%)                          | 7.69           | (1.7, 44.8)   | 29.16                                                | (1.91, 303)   |
| PCB66                           | 134 (64.4%)         | 14.53          | (1.84, 197)   | 107 (62.9%)                          | 3.87           | (0.78, 26.6)  | 14.87                                                | (1.84, 197)   |
| PCB74                           | 164 (78.8%)         | 12.89          | (1.84, 106)   | 160 (94.1%)                          | 6.06           | (1.41, 26.6)  | 13.03                                                | (1.84, 106)   |
| PCB99                           | 125 (60.1%)         | 10.02          | (1.84, 61.2)  | 152 (89.4%)                          | 6.32           | (1.2, 34.3)   | 9.99                                                 | (1.84, 61.2)  |
| PCB118                          | 114 (54.8%)         | 12.01          | (2.76, 64.5)  | 148 (87.1%)                          | 8.29           | (1.56, 51.2)  | 11.86                                                | (2.76, 64.5)  |
| PCB138.158                      | 188 (90.4%)         | 19.43          | (3.3, 106)    | 169 (99.4%)                          | 16.8           | (3.4, 92.3)   | 19.45                                                | (3.3, 106)    |
| PCB153                          | 192 (92.3%)         | 23.52          | (4.3, 116)    | 168 (98.8%)                          | 23.15          | (3.46, 130)   | 23.18                                                | (4.3, 116)    |
| PCB180                          | 113 (54.3%)         | 11.01          | (1.63, 101)   | 155 (91.2%)                          | 12.21          | (1.9, 81)     | 10.71                                                | (1.63, 101)   |
| <i>Cord Blood PBDEs (N=210)</i> |                     |                |               | <i>Maternal Plasma PBDEs (N=163)</i> |                |               | <i>Cord and Maternal-to-Cord Transformed (N=264)</i> |               |
|                                 | Number Detected (%) | Geometric Mean | Range         | Number Detected (%)                  | Geometric Mean | Range         | Geometric Mean                                       | Range         |
| BDE47                           | 176 (83.8%)         | 11.18          | (0.57, 613.1) | 156 (95.7%)                          | 17.1           | (0.21, 28.9)  | 11.54                                                | (0.57, 613.1) |
| BDE99                           | 130 (61.9%)         | 3.24           | (0.28, 202.9) | 149 (91.4%)                          | 8.21           | (0.71, 507.4) | 3.34                                                 | (0.28, 202.9) |
| BDE100                          | 139 (66.5%)         | 1.66           | (0.3, 71.9)   | 155 (95.1%)                          | 3.67           | (0.35, 277.5) | 1.7                                                  | (0.30, 71.9)  |
| BB153                           | 114 (54.3%)         | 1.07           | (0.21, 28.9)  | 160 (98.2%)                          | 3.33           | (0.14, 106.0) | 1.09                                                 | (0.15, 28.9)  |
| <i>Cord Blood PCDDs (N=210)</i> |                     |                |               | <i>Maternal Plasma PCDDs (N=173)</i> |                |               | NA                                                   | NA            |
|                                 | Number Detected (%) | Geometric Mean | Range         | Number Detected (%)                  | Geometric Mean | Range         |                                                      |               |
| 123678D                         | 18 (8.6%)           | 18.61          | (5.52, 105.2) | 87 (50.3%)                           | 10.5           | (1.7, 56.4)   | ---                                                  | ---           |

|          |            |        |               |             |       |              |     |     |
|----------|------------|--------|---------------|-------------|-------|--------------|-----|-----|
| 1234678D | 86 (41%)   | 26.73  | (6.08, 245)   | 153 (88.4%) | 21.4  | (2.62, 135)  | --- | --- |
| OCDD     | 96 (45.7%) | 237.01 | (56.6, 10100) | 145 (83.8%) | 204.5 | (16.3, 1060) | --- | --- |

**Table S3. Principal Component (PC) Loadings for PCDDs, PBDEs and PCBs.**

| Chemicals                     | PC1      | PC2      | PC3      | PC4      |
|-------------------------------|----------|----------|----------|----------|
| 123678D Maternal              | 0.05341  | 0.096757 | 0.46363  | 0.166105 |
| 1234678D Maternal             | 0.055326 | 0.052087 | 0.494714 | 0.355394 |
| OCDD Maternal                 | 0.01529  | 0.058649 | 0.548409 | 0.265903 |
| PBDE 47 Transformed           | -0.0053  | -0.52301 | -0.00937 | 0.105302 |
| PBDE 99 Transformed           | 0.041776 | -0.47427 | 0.013871 | 0.14732  |
| PBDE 100 Transformed          | 0.008802 | -0.54024 | 0.029428 | 0.070428 |
| PBDE 153 Transformed          | 0.044896 | -0.42086 | 0.067035 | -0.03038 |
| PCB 44 Transformed            | 0.321525 | 0.058839 | -0.1743  | 0.274513 |
| PCB 49 Transformed            | 0.319849 | 0.066676 | -0.18074 | 0.261297 |
| PCB 52 Transformed            | 0.319483 | 0.027815 | -0.17725 | 0.225438 |
| PCB 66 Transformed            | 0.322968 | 0.049375 | -0.13248 | 0.21274  |
| PCB 74 Transformed            | 0.342966 | 0.027188 | -0.03758 | 0.103459 |
| PCB 99 Transformed            | 0.341401 | -0.00519 | -0.01805 | -0.05472 |
| PCB 118 Transformed           | 0.337032 | -0.03488 | 0.042986 | -0.12324 |
| PCB 138.158 Transformed       | 0.298014 | -0.02571 | 0.12194  | -0.36034 |
| PCB 153 Transformed           | 0.285822 | -0.04439 | 0.184492 | -0.4091  |
| PCB 180 Transformed           | 0.244233 | -0.03595 | 0.263448 | -0.41342 |
| <b>Proportion of Variance</b> | 0.44     | 0.19     | 0.13     | 0.09     |

**Table S4. Interactions between Chemical Principal Components (PC) and Demoralization with Birth Outcomes.**

|                      | Birth Weight           | Birth Length         |
|----------------------|------------------------|----------------------|
| <b>PC1</b>           |                        |                      |
| Low Demoralization   | -45.1 (-92.6, 2.32)    | 0.13 (-0.15, 0.4)    |
| High Demoralization  | -44.9 (-90.2, 0.53)    | -0.12 (-0.38, 0.15)  |
| <i>P-Interaction</i> | 0.99                   | 0.20                 |
| <b>PC2</b>           |                        |                      |
| Low Demoralization   | 37.7 (-29.9, 105.3)    | 0.08 (-0.31, 0.47)   |
| High Demoralization  | -26.2 (-103.8, 51.3)   | 0.18 (-0.26, 0.62)   |
| <i>P-Interaction</i> | 0.22                   | 0.74                 |
| <b>PC3</b>           |                        |                      |
| Low Demoralization   | -134.7 (-224.02 -45.3) | -0.67 (-1.18, -0.15) |
| High Demoralization  | -53.6 (-129.5, 22.3)   | -0.26 (-0.69, 0.18)  |
| <i>P-Interaction</i> | 0.16                   | 0.21                 |
| <b>PC4</b>           |                        |                      |
| Low Demoralization   | 18.6 (-95.4, 132.5)    | -0.28 (-0.92, 0.37)  |
| High Demoralization  | 21.9 (-72.0, 115.8)    | -0.22 (-0.75, 0.31)  |
| <i>P-Interaction</i> | 0.96                   | 0.89                 |

Models adjusted for maternal race, age, parity, Medicaid status, pregnancy complications, and child sex

**Table S5. Mean Difference (95% CI) in Chemical Principal Components (PC) by WTC Proximity Exposure Categories Using Inverse Probability Stabilized Weights.**

|                    | PC1                 | PC2                | PC3               | PC4                | Demoralization      |
|--------------------|---------------------|--------------------|-------------------|--------------------|---------------------|
| Live/work <2 miles | -0.34 (-1.67, 0.98) | -0.36 (-1.03, 0.3) | 0.73 (0.24, 1.22) | 0.08 (-0.55, 0.71) | 0.03 (-0.16, 0.23)  |
| Live <2 miles      | 0.33 (-1.2, 1.87)   | 0.12 (-0.62, 0.86) | 0.76 (0.24, 1.29) | 0.3 (-0.45, 1.05)  | -0.06 (-0.28, 0.15) |

Models adjusted for maternal age, parity, race, education, pre-pregnancy BMI, family smoking status, trimester on 9/11 and child sex

**Table S6. Mean Difference (95% CI) in Birth Outcomes by Chemical Principal Components (PCs) and Demoralization Using Inverse Probability Stabilized Weights.**

|                | Birth Weight (g)       | Birth Length (cm)    |
|----------------|------------------------|----------------------|
| PC1            | 19.3 (-15.2, 53.7)     | -0.11 (-0.35, 0.12)  |
| PC2            | -19.9 (-77.6, 37.8)    | 0.11 (-0.17, 0.39)   |
| PC3            | -109.6 (-189.8, -29.5) | -0.57 (-1.06, -0.08) |
| PC4            | 9.75 (-50.9, 70.4)     | -0.17 (-0.66, 0.31)  |
| Demoralization | -191.2 (-393.2, 10.8)  | -0.60 (-1.71, 0.52)  |

Models adjusted for maternal age, parity, race, education, pre-pregnancy, BMI, family smoking status, trimester on 9/11 and child sex

**Table S7. Mean Difference (95% CI) in Birth Outcomes by Geographic WTC Proximity Exposure Categories Before and After Adjustment for Chemical Principal Components (PC) and Maternal Demoralization Using Inverse Probability Stabilized Weights.**

|                     | Model 1                | Model 1 + PC1          | Model 1 + PC2          | Model 1 + PC3         | Model 1 + PC4          | Model 1 + Demoralization |
|---------------------|------------------------|------------------------|------------------------|-----------------------|------------------------|--------------------------|
| <b>Birth Weight</b> |                        |                        |                        |                       |                        |                          |
| Live/work <2 miles  | -194.1 (-402.0, 13.7)  | -188.2 (-395.8, 19.4)  | -203.9 (-410.8, 2.93)  | -130.5 (-341.3, 80.3) | -195.3 (-403.9, 13.4)  | -187.0 (-390.8, 16.7)    |
| Live <2 miles       | -235.1 (-462.2, -8.12) | -242.2 (-482.7, -1.74) | -233.5 (-459.0, -7.99) | -168.1 (-397.3, 61.2) | -239.9 (-464.8, -15.0) | -248.0 (-469.5, -26.5)   |
| <b>Birth Length</b> |                        |                        |                        |                       |                        |                          |
| Live/work <2 miles  | -0.79 (-1.87, 0.30)    | -0.83 (-1.93, 0.27)    | -0.75 (-1.85, 0.35)    | -0.45 (-1.5, 0.6)     | -0.77 (-1.85, 0.32)    | -0.77 (-1.85, 0.32)      |
| Live <2 miles       | -1.81 (-3.23, -0.38)   | -1.78 (-3.15, -0.4)    | -1.82 (-3.26, -0.39)   | -1.5 (-2.8, -0.21)    | -1.77 (-3.26, -0.27)   | -1.85 (-3.28, -0.43)     |

Model 1 adjusted for maternal race, age, parity, Medicaid status, pregnancy complications, and child sex

**Table S8. Mean Difference (95% CI) in Chemical Principal Components (PC) by WTC Proximity Exposure Categories Using Multiple Imputation by Chained Equations.**

|                    | PC1                | PC2                 | PC3               | PC4                | Demoralization     |
|--------------------|--------------------|---------------------|-------------------|--------------------|--------------------|
| Live/work <2 miles | 0.01 (-0.84, 0.86) | -0.08 (-0.68, 0.52) | 0.91 (0.47, 1.34) | 0.15 (-0.32, 0.62) | 0.09 (-0.01, 0.19) |
| Live <2 miles      | 0.59 (-0.35, 1.53) | 0.17 (-0.46, 0.79)  | 0.79 (0.30, 1.29) | 0.06 (-0.44, 0.56) | 0.05 (-0.07, 0.16) |

Models adjusted for maternal age, parity, race, education, pre-pregnancy BMI, family smoking status, trimester on 9/11 and child sex

**Table S9. Mean Difference (95% CI) in Birth Outcomes by Chemical Principal Components (PCs) and Demoralization Using Multiple Imputation by Chained Equations.**

|                | Birth Weight (g)     | Birth Length (cm)   |
|----------------|----------------------|---------------------|
| PC1            | 27.2 (1.92, 52.5)    | 0.00 (-0.16, 0.16)  |
| PC2            | 6.21 (-34.1, 46.5)   | 0.20 (-0.06, 0.47)  |
| PC3            | -43.3 (-93.8, 7.08)  | -0.27 (-0.55, 0.01) |
| PC4            | 27.8 (-21.6, 77.2)   | 0.00 (-0.33, 0.33)  |
| Demoralization | -33.1 (-143.3, 77.1) | -0.28 (-0.95, 0.38) |

Models adjusted for maternal age, parity, race, education, pre-pregnancy BMI, family smoking status, trimester on 9/11 and child sex



**Table S10. Mean Difference (95% CI) in Birth Outcomes by Geographic WTC Proximity Exposure Categories Before and After Adjustment for Chemical Principal Components (PC) and Maternal Demoralization Using Multiple Imputation by Chained Equations.**

|                     | Model 1                | Model 1 + PC1          | Model 1 + PC2           | Model 1 + PC3         | Model 1 + PC4          | Model 1 + Demoralization |
|---------------------|------------------------|------------------------|-------------------------|-----------------------|------------------------|--------------------------|
| <b>Birth Weight</b> |                        |                        |                         |                       |                        |                          |
| Live/work <2 miles  | -109.2 (-209.6, -8.75) | -109.1 (-209.4, -8.75) | -109.5 (-210.5, -8.47)  | -78.7 (-190.8, 33.3)  | -113.5 (-214.3, -12.8) | -106.9 (-207.9, -5.91)   |
| Live <2 miles       | -140.9 (-252.7, -29.2) | -158.7 (-271.9, -45.6) | -143.1 (-255.4, -30.77) | -114.5 (-234.5, 5.36) | -142.6 (-254.7, -30.6) | -139.5 (-251.5, -27.5)   |
| <b>Birth Length</b> |                        |                        |                         |                       |                        |                          |
| Live/work <2 miles  | -0.31 (-0.92, 0.3)     | -0.31 (-0.93, 0.3)     | -0.29 (-0.91, 0.33)     | -0.07 (-0.75, 0.61)   | -0.31 (-0.92, 0.3)     | -0.29 (-0.9, 0.32)       |
| Live <2 miles       | -0.86 (-1.53, -0.19)   | -0.87 (-1.55, -0.19)   | -0.90 (-1.58, -0.21)    | -0.69 (-1.42, 0.04)   | -0.86 (-1.53, -0.19)   | -0.85 (-1.52, -0.17)     |

Model 1 adjusted for maternal race, age, parity, Medicaid status, pregnancy complications, and child sex

## Descriptions

**Figure S1.** Part “a” shows associations between geographical WTC exposure and birth outcomes that have been previously observed and reported in this study population. Part “b” shows associations that were evaluated in the current study.

**Figure S2a.** The upper panel shows the Spearman pairwise correlation coefficients. The lower panel shows the pairwise scatterplots. The axes indicate values in the log-scale.

**Figure S2b.** The upper panel shows the Spearman pairwise correlation coefficients. The lower panel shows the pairwise scatterplots. The axes indicate values in the log-scale.

**Figure S3.** The upper panel shows the Spearman pairwise correlation coefficients. The lower panel shows the pairwise scatterplots. The axes indicate values in the log-scale.

## References

1. Lederman SA, Rauh V, Weiss L, et al. The effects of the World Trade Center event on birth outcomes among term deliveries at three lower Manhattan hospitals. *Environ Health Perspect.* 2004;112(17):1772-1778.
